# Supplementary material for: Cryopreservation of Neurospheres Derived from Human Glioblastoma Multiforme
Source: PubMed Central journal article supplement (PMC2729678; doi:10.1634/stemcells.2008-0009), 2009-01
Supplement: stem0027-0029-SD5.pdf [file stem0027-0029-SD5.pdf]

Supplemental Table 1 Tang et al.

Primers used for real-time PCR

| mRNA target                 | Oligonucleotides (5'→ 3')                | Product Size (bp) /<br>Temperature(°C) |
|-----------------------------|------------------------------------------|----------------------------------------|
| Bmi-1                       | Forward: AAA GAT ACT TAC GAT GCC CAG     | 183                                    |
|                             | Reverse: GAA GTG GAC CAT TCC TTC TC      | 55                                     |
| CD133                       | Forward: GAA CAA GTT TAC AGT GAC TGC     | 444                                    |
|                             | Reverse: TGC GTT GAA GTA TCTT TGA CG     | 55                                     |
| GAPDH                       | Forward: GGA AGG TGA AGG TCG GAG TC      | 556                                    |
|                             | Reverse: GTC TTG TGG GTG GCA GTG AT      | 55                                     |
| GFAP                        | Forward: GGG ATG GAG AGG TCA TTA AGG     | 287                                    |
|                             | Reverse: GGG TGA GTT TCT TGT TAG TTG G   | 55                                     |
| MOBP                        | Forward: GAC TCA TTG CTT CAC AAC CC      | 152                                    |
|                             | Reverse: CTT CAA AGT ACT CCA GGC AG      | 55                                     |
| Musashi-1 (Msi-1)           | Forward: GTT TCG GCT TCG TCA CTT TC      | 135                                    |
|                             | Reverse: GAG TCA CCA TCT TGG GCT GT      | 55                                     |
| Nanog                       | Forward: AGC TAC AAA CAG GTG AAG AC      | 218                                    |
|                             | Reverse: CTC CAG GTT GAA TTG TTC CA      | 55                                     |
| Nestin                      | Forward: AGA CAC CTG TGC CAG CCT TTC     | 469                                    |
|                             | Reverse: CTG CTG CAA GCT GCT TAC CAC     | 55                                     |
| OCT-4                       | Forward: GGT TCT ATT TGG GAA GGT ATT CAG | 119                                    |
|                             | Reverse: GGT TTC TGC TTT GCA TAT CTC     | 55                                     |
| Sox-2                       | Forward: AGC TGG GAT AGG CCT CAC TT      | 187                                    |
|                             | Reverse: TGA ATC CAT TTC GGC TTT TC      | 55                                     |
| $\beta$ -Tubulin III (Tuj1) | Forward: CTT CAT TTC CCG TCA GTG TG      | 225                                    |
|                             | Reverse: TAT AAT CCT GTC TGG GTA CTC CT  | 55                                     |
