# Supplementary material for: Cryopreservation of Neurospheres Derived from Human Glioblastoma Multiforme
Source: PubMed Central journal article supplement (PMC2729678; doi:10.1634/stemcells.2008-0009), 2009-01
Supplement: stem0027-0029-SD6.pdf [file stem0027-0029-SD6.pdf]

Supplemental Table 2 Tang et al.

**A. Immunofluorescence quantification (% mean  $\pm$  SEM) of undifferentiated primary cell lines**

| Primary GBM | Markers        |                |                |                |                |                |                |                |
|-------------|----------------|----------------|----------------|----------------|----------------|----------------|----------------|----------------|
|             | Nestin         |                | Msi-1          |                | Ki-67          |                | Oct-4          |                |
|             | V              | NV             | V              | NV             | V              | NV             | V              | NV             |
| S0305       | 90.7 $\pm$ 2.6 | 89.0 $\pm$ 1.5 | 95.4 $\pm$ 2.0 | 84.9 $\pm$ 2.0 | 21.0 $\pm$ 2.8 | 31.0 $\pm$ 0.8 | 82.6 $\pm$ 2.3 | 83.9 $\pm$ 1.2 |
| S0405       | 97.0 $\pm$ 0.7 | 94.7 $\pm$ 0.2 | 95.0 $\pm$ 0.2 | 96.1 $\pm$ 1.4 | 19.7 $\pm$ 0.3 | 21.6 $\pm$ 1.8 | 73.5 $\pm$ 5.7 | 74.5 $\pm$ 5.0 |
| S0807       | 99.2 $\pm$ 0.6 | 96.4 $\pm$ 0.8 | 98.0 $\pm$ 0.1 | 98.5 $\pm$ 0.7 | 21.3 $\pm$ 1.8 | 22.0 $\pm$ 3.8 | 93.8 $\pm$ 1.5 | 95.7 $\pm$ 0.2 |
| S0306       | 97.6 $\pm$ 0.6 | 93.4 $\pm$ 1.4 | 83.2 $\pm$ 2.5 | 87.5 $\pm$ 0.6 | 34.3 $\pm$ 3.9 | 43.6 $\pm$ 4.3 | 86.3 $\pm$ 4.3 | 90.8 $\pm$ 2.7 |
| S0805       | 94.0 $\pm$ 2.7 | 92.4 $\pm$ 2.2 | 92.7 $\pm$ 0.7 | 97.6 $\pm$ 0.6 | 24.3 $\pm$ 0.5 | 32.8 $\pm$ 5.3 | 91.4 $\pm$ 3.5 | 95.1 $\pm$ 0.3 |

**B. Immunofluorescence quantification (% mean  $\pm$  SEM) of differentiated primary cell lines**

| Primary GBM | Markers        |                |                |                 |                |                |                |                |                |                |                |                |
|-------------|----------------|----------------|----------------|-----------------|----------------|----------------|----------------|----------------|----------------|----------------|----------------|----------------|
|             | Nestin         |                | Msi-1          |                 | TuJ1           |                | GFAP           |                | TuJ1+GFAP      |                | O4             |                |
|             | V              | NV             | V              | NV              | V              | NV             | V              | NV             | V              | NV             | V              | NV             |
| S0305       | 81.5 $\pm$ 3.2 | 84.1 $\pm$ 2.0 | 94.1 $\pm$ 2.2 | 97.2 $\pm$ 1.0  | 16.2 $\pm$ 3.8 | 14.7 $\pm$ 1.5 | 77.3 $\pm$ 2.4 | 78.6 $\pm$ 4.9 | 2.0 $\pm$ 0.2  | 2.0 $\pm$ 0.2  | 1.2 $\pm$ 0.3  | 1.0 $\pm$ 0.3  |
| S0405       | 71.4 $\pm$ 4.3 | 71.3 $\pm$ 2.6 | 92.0 $\pm$ 0.7 | 91.2 $\pm$ 2.6  | 25.5 $\pm$ 3.9 | 25.2 $\pm$ 1.6 | 53.9 $\pm$ 1.8 | 50.1 $\pm$ 6.7 | 6.4 $\pm$ 1.5  | 6.4 $\pm$ 1.2  | 0.0 $\pm$ 0.0  | 0.0 $\pm$ 0.0  |
| S0807       | 93.1 $\pm$ 1.0 | 91.5 $\pm$ 2.9 | 98.2 $\pm$ 1.0 | 97.7 $\pm$ 0.4  | 35.8 $\pm$ 1.8 | 38.4 $\pm$ 3.1 | 49.4 $\pm$ 4.8 | 50.9 $\pm$ 5.3 | 8.0 $\pm$ 1.0  | 8.0 $\pm$ 1.4  | 6.3 $\pm$ 3.5  | 4.9 $\pm$ 0.8  |
| S0306       | 95.5 $\pm$ 0.4 | 95.9 $\pm$ 2.9 | 97.2 $\pm$ 1.2 | 100.0 $\pm$ 0.0 | 86.5 $\pm$ 5.5 | 95.0 $\pm$ 2.0 | 92.4 $\pm$ 3.0 | 97.9 $\pm$ 2.2 | 77.0 $\pm$ 7.5 | 85.0 $\pm$ 9.0 | 0.0 $\pm$ 0.0  | 0.0 $\pm$ 0.0  |
| S0805       | 85.7 $\pm$ 1.1 | 84.8 $\pm$ 3.7 | 97.1 $\pm$ 0.5 | 98.3 $\pm$ 1.2  | 15.5 $\pm$ 2.7 | 13.7 $\pm$ 1.1 | 85.4 $\pm$ 2.5 | 92.3 $\pm$ 1.7 | 4.7 $\pm$ 0.6  | 6.7 $\pm$ 0.4  | 20.9 $\pm$ 2.0 | 17.0 $\pm$ 0.9 |
